# Supplementary material for: Low HDL cholesterol and the eNOS Glu298Asp polymorphism are associated with inducible myocardial ischemia in patients with suspected stable coronary artery disease
Source: Springer Nature journal article supplement (doi:10.1186/s12872-024-03846-7), 2024-03-22
Supplement: MOESM1 [file 26898116]

**Table 1 Suppl mat:** Comparison of clinical characteristics, modifiable risk factors and clinical-chemistry laboratory data among patient groups defined by eNOS genotypes.

| Clinical characteristics                  | Glu/Glu genotype<br>n=251 | Glu/Asp genotype<br>n=207 | Asp/Asp genotype<br>n=48 | p-value | Glu/Glu genotype<br>n=251 | Asp genotype<br>n=255 | p-value |
|-------------------------------------------|---------------------------|---------------------------|--------------------------|---------|---------------------------|-----------------------|---------|
| Age, years                                | 62.1±8.7                  | 62.2±9.4                  | 60.0±10.1                | ns      | 62.1±8.8                  | 61.8±9.6              | ns      |
| Male gender                               | 56                        | 66                        | 75                       | 0.01    | 56                        | 68                    | 0.007   |
| Family history of CAD                     | 47                        | 52                        | 50                       | ns      | 47                        | 51                    | ns      |
| LVEF %                                    | 61.0±5.1                  | 60.4±5.4                  | 61.1±5.7                 | ns      | 61.0±5.1                  | 60.5±5.0              | ns      |
| <b>Symptoms</b>                           |                           |                           |                          |         |                           |                       |         |
| Typical angina                            | 41                        | 39                        | 39                       | ns      | 41                        | 39                    | ns      |
| <b>Medications</b>                        |                           |                           |                          |         |                           |                       |         |
| Antihypertensives and Anti-ischemics      | 66                        | 73                        | 71                       | ns      | 66                        | 73                    | ns      |
| Aspirin                                   | 42                        | 46                        | 50                       | ns      | 42                        | 47                    | ns      |
| Statins                                   | 33                        | 38                        | 50                       | ns      | 33                        | 40                    | ns      |
| Anti diabetic therapy                     | 15                        | 18                        | 17                       | ns      | 15                        | 17                    | ns      |
| <b>Modifiable Risk factors</b>            |                           |                           |                          |         |                           |                       |         |
| High SBP*                                 | 68                        | 62                        | 54                       | ns      | 68                        | 60                    | ns      |
| High LDL-C                                | 49                        | 47                        | 49                       | ns      | 50                        | 50                    | ns      |
| Smoking                                   | 20                        | 19                        | 23                       | ns      | 20                        | 12                    | ns      |
| High BMI*                                 | 19                        | 19                        | 23                       | ns      | 19                        | 20                    | ns      |
| High FPG*                                 | 56                        | 54                        | 56                       | ns      | 56                        | 54                    | ns      |
| Low HDL-C*                                | 29                        | 29                        | 22                       | ns      | 29                        | 27                    | ns      |
| High TG*                                  | 25                        | 27                        | 19                       | ns      | 25                        | 25                    | ns      |
| Metabolic Syndrome                        | 32                        | 28                        | 27                       | ns      | 33                        | 28                    | ns      |
| <b>Laboratory clinical-chemistry data</b> |                           |                           |                          |         |                           |                       |         |
| Total-C, mg/dL                            | 192±47                    | 187±49                    | 187±49                   | ns      | 192±47                    | 187±49                | ns      |
| HDL-C, mg/dL                              | 54±18                     | 51±16                     | 51±15                    | ns      | 54±18                     | 51±16                 | 0.04    |
| LDL-C, mg/dL                              | 115±38                    | 112±39                    | 112±48                   | ns      | 115±38                    | 111±39                | ns      |
| TG, mg/dL                                 | 115±64                    | 122±65                    | 116±59                   | ns      | 115±64                    | 121±64                | ns      |
| ApoA1, mg/dL                              | 137±41                    | 125±42                    | 131±36                   | ns      | 137±41                    | 126±41                | 0.04    |
| TG/HDL-C                                  | 2.5±1.9                   | 2.7±1.8                   | 2.5±1.6                  | 0.05    | 2.5±1.9                   | 2.6±1.7               | 0.02    |
| Glucose, mg/dL                            | 106.1±27.9                | 106±31                    | 101±19                   | ns      | 106.1±27.9                | 105±28                | ns      |
| Insulin, µUI/mL                           | 10.2±108                  | 9.89.2                    | 8.3±5.3                  | ns      | 10.2±10.8                 | 9.5±8.6               | ns      |
| HOMA index                                | 2.9±4.3                   | 2.8±2.8                   | 2.1±1.5                  | ns      | 2.9±4.3                   | 2.6±2.6               | ns      |

Continuous variables are presented as mean±standard deviation, categorical variables as (%)

CAD: coronary artery disease; high SBP (SBP=systolic blood pressure): SBP ≥130/85 mmHg or antihypertensive medication; Total-C (C=cholesterol); high LDL-C (LDL-C=LDL cholesterol): LDL-C>115mg/dL;

high BMI (BMI= body mass index): BMI > 30 Kg/m<sup>2</sup>; high FPG (FPG=fasting plasma glucose): high FPG: diabetes or FPG > 100 mg/dL; low HDL-C (HDL-C=HDL cholesterol): HDL-C <50 mg/dl in women and <40 mg/dl in men or specific treatment for this lipid abnormality; high TG (TG= triglycerides): TG ≥150 mg/dl or specific treatment for this lipid abnormality; ApoA1= Apolipoprotein 1.

\*= component of metabolic syndrome

**Table 2 Suppl mat.** Predictors of obstructive CAD and inducible myocardial ischemia at multivariate analyses by logistic regression analysis

|                              | <b>Obstructive CAD</b>                                | <b>Inducible Myocardial Ischemia</b>                  |
|------------------------------|-------------------------------------------------------|-------------------------------------------------------|
|                              | <i>Multivariate analysis<br/>OR (CI 95%), p-value</i> | <i>Multivariate analysis<br/>OR (CI 95%), p-value</i> |
| <b>Age</b>                   | 1.1(1.0-1.11), p<0.0001                               | 1.0(1.0-1.1), p=0.01                                  |
| <b>Male sex</b>              | 4.7(2.9-7.6), p<0.0001                                | 1.9(1.1-3.1), p=0.01                                  |
| <b>Family History of CAD</b> | ns                                                    | 0.6(0.4-1.1), p=0.07                                  |
| <b>Metabolic Syndrome</b>    | 1.4(0.9-2.2), p=0.1                                   | 0.7(0.4-1.2), p=0.2                                   |
| <b>High LDL-C</b>            | ns                                                    | 0.6(0.4-1.1), p=0.07                                  |
| <b>Smoking</b>               | 1.8(1.1-3.1), p=0.03                                  | 1.4(0.8-2.5), p=0.3                                   |
| <b>eNOS Asp genotype</b>     | -                                                     | 2.1(1.3-3.4), p=0.003                                 |

ns= not significant

CAD: coronary artery disease; high LDL-C (LDL-C=LDL cholesterol): LDL-C >115mg/dL

**Table 3 Suppl mat:** Comparison of clinical characteristics, modifiable risk factors and laboratory clinical-chemistry data among patient groups defined by absence/presence of obstructive CAD and absence/presence of inducible MI

|                                           | no CAD- no MI<br>n=87 | CAD and MI<br>n=84 | p-value |
|-------------------------------------------|-----------------------|--------------------|---------|
| <b>Clinical characteristics</b>           |                       |                    |         |
| Age, years                                | 59.1±9.3              | 63.6±8.9           | 0.001   |
| Male gender                               | 49                    | 84                 | <0.0001 |
| Family history of CAD                     | 53                    | 49                 | ns      |
| LVEF (%)                                  | 62±5                  | 60±5               | 0.006   |
| <b>Symptoms</b>                           |                       |                    |         |
| Typical Angina                            | 40                    | 56                 | 0.04    |
| <b>Medications</b>                        |                       |                    |         |
| Antihypertensives and<br>Anti-ischemics   | 70                    | 63                 | ns      |
| Aspirin                                   | 52                    | 48                 | ns      |
| Statins                                   | 29                    | 29                 | ns      |
| Anti diabetic therapy                     | 21                    | 17                 | ns      |
| <b>Modifiable Risk factors</b>            |                       |                    |         |
| High SBP                                  | 29                    | 34                 | ns      |
| High LDL-C                                | 61                    | 39                 | 0.003   |
| Smoking                                   | 22                    | 25                 | ns      |
| High BMI                                  | 31                    | 12                 | 0.002   |
| High FPG                                  | 53                    | 52                 | ns      |
| Low HDL-C                                 | 10                    | 39                 | <0.0001 |
| High TG                                   | 22                    | 36                 | 0.04    |
| Metabolic Syndrome                        | 29                    | 34                 | ns      |
| <b>Laboratory clinical-chemistry data</b> |                       |                    |         |
| Total-C, mg/dL                            | 212.7±41.5            | 177.8±49.1         | <0.0001 |
| LDL-C, mg/dL                              | 129.1±34.1            | 109.0±40.7         | 0.0002  |
| HDL-C, mg/dL                              | 61.0±18.2             | 44.4±12.7          | <0.0001 |
| TG, mg/dL                                 | 114.9±54.2            | 130.0±64.0         | ns      |
| ApoA1, mg/dL                              | 138.8±43.5            | 120.4±37.3         | 0.01    |
| TG/HDL                                    | 2.1±1.3               | 3.1±1.9            | <0.0001 |
| Glucose, mg/dL                            | 108.2±33.2            | 104.1±34.5         | ns      |
| Insulin, µU/ml                            | 8.9±5.3               | 9.2±8.4            | ns      |
| HOMA Index                                | 2.5±1.9               | 2.5±2.5            | ns      |
| <b>Genotype distribution</b>              |                       |                    |         |

|                |    |    |      |
|----------------|----|----|------|
| <i>Glu/Glu</i> | 58 | 42 |      |
| <i>Glu/Asp</i> | 33 | 45 | ns   |
| <i>Asp/Asp</i> | 9  | 13 |      |
| <i>Glu/Glu</i> | 57 | 42 | 0.03 |
| <i>Asp</i>     | 43 | 58 |      |

---

Continuous variables are presented as mean±standard deviation, categorical variables as (%)

CAD: coronary artery disease; MI: myocardial ischemia ; high SBP (SBP=systolic blood pressure): SBP ≥130/85 mmHg or antihypertensive medication; Total-C (C=cholesterol); high LDL-C (LDL-C=LDL cholesterol): LDL-C >115mg/dL; high BMI (BMI= body mass index): BMI > 30 Kg/m<sup>2</sup>; high FPG (FPG=fasting plasma glucose): high FPG: diabetes or FPG > 100 mg/dL; low HDL-C (HDL-C=HDL cholesterol): HDL-C <50 mg/dl in women and <40 mg/dl in men or specific treatment for this lipid abnormality; high TG (TG= triglycerides): TG ≥150 mg/dl or specific treatment for this lipid abnormality; ApoA1= Apolipoprotein 1.

\*= component of metabolic syndrome
